# Supplementary material for: Physical insights into the ultralow lattice thermal conductivity and high thermoelectric performance of bulk LiMTe2 (M = Al, Ga)
Source: Royal Society of Chemistry journal article supplement (doi:10.1039/d3tc02314a), 2023-01-01
Supplement: d3tc02314a1.pdf [file d3tc02314a1.pdf]

## Supporting Information (SI)

# Physical Insights on the Ultralow Lattice Thermal Conductivity and High Thermoelectric Performance of Bulk LiMTe<sub>2</sub> (M=Al, Ga)

Sampad Mandal and Pranab Sarkar\*

*Department of Chemistry, Visva-Bharati, Santiniketan, 731235, India*

E-mail: pranab.sarkar@visva-bharati.ac.in

### S1. Convergence of $\kappa_l$ with respect to q-grid

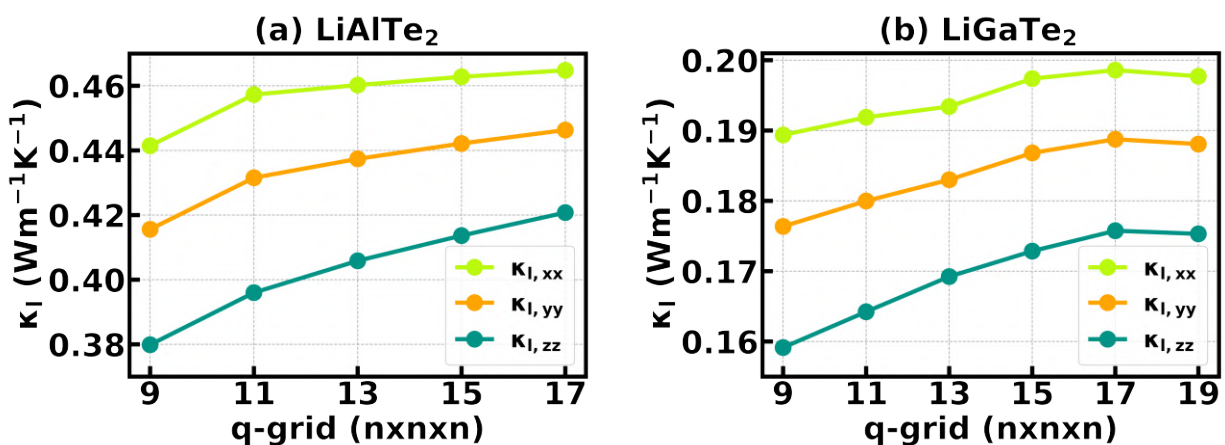

Figure S1: Convergence of  $\kappa_l$  at 300 K with respect to q-grid

## S2. Convergence of $\kappa_l$ with respect to number of nearest neighbour atoms

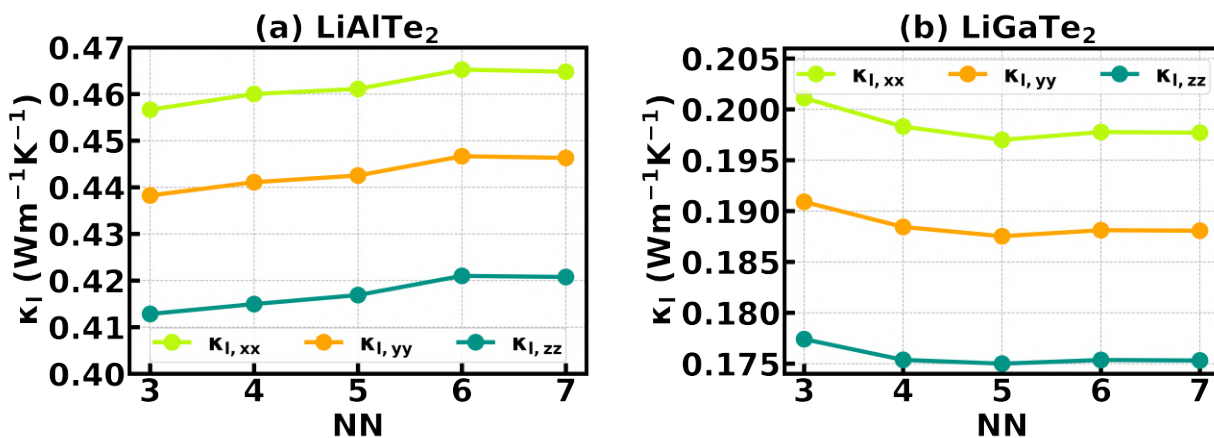

Figure S2: Convergence of  $\kappa_l$  at 300 K with respect to number of nearest neighbour atoms

## S3. AIMD

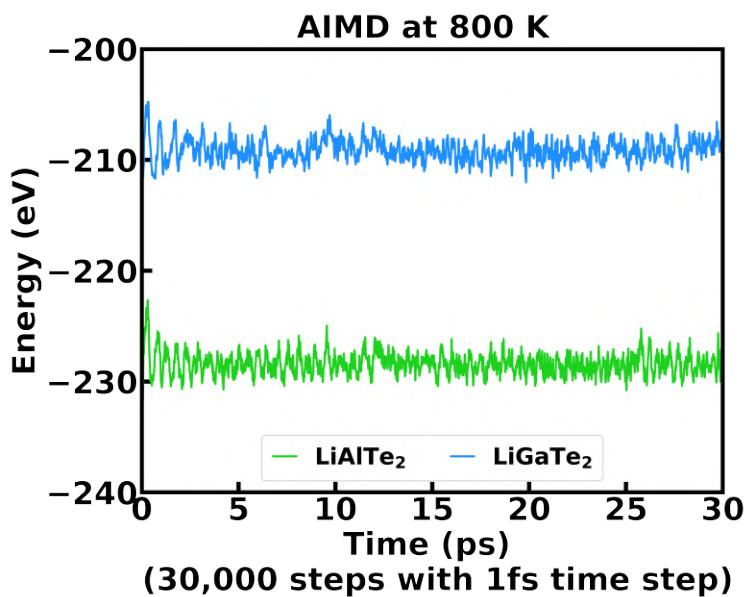

Figure S3: ab initio molecular dynamics simulation at 800 K

## S4. Phonon group velocities along q-path

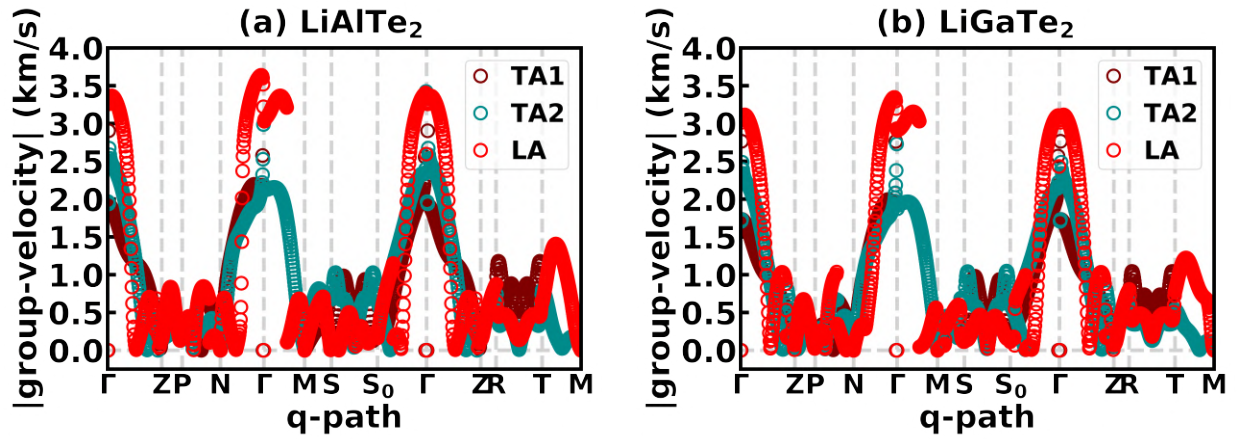

Figure S4: Phonon group velocity along q-path

## S5. Phase spaces at 800 K for the three phonon scattering processes

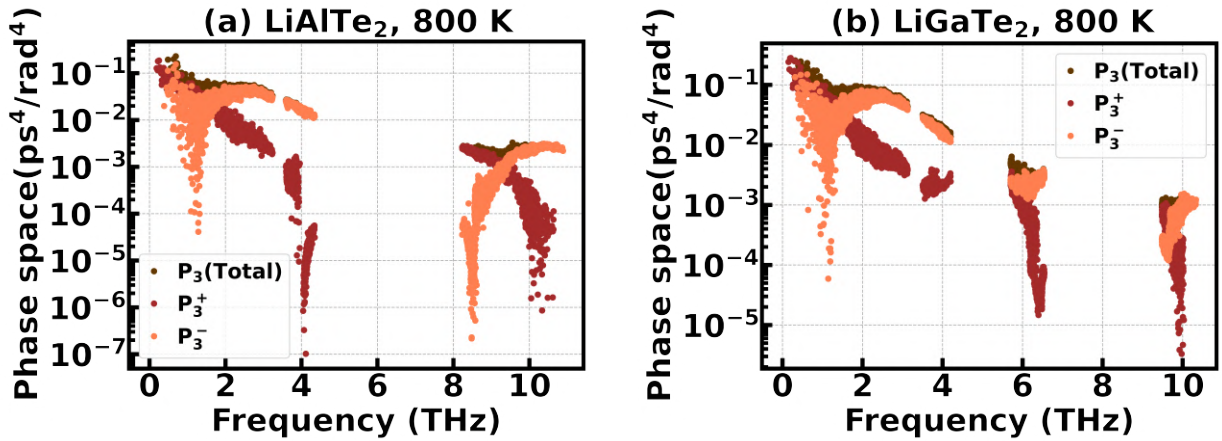

Figure S5: Weighted Phase space at 800 K

## S6. Cumulative Lattice Thermal Conductivities at 800 K

K

At 800 K, the acoustic and low-frequency optical branches contributed (64.9, 63.9, 62.4) % and (24.7, 25.1, 25.8) %, respectively, to the lattice thermal conductivities ( $\kappa_{l,xx}$ ,  $\kappa_{l,yy}$ ,  $\kappa_{l,zz}$ ) of LiAlTe<sub>2</sub>. In case of LiGaTe<sub>2</sub>, contribution to the lattice thermal conductivities ( $\kappa_{l,xx}$ ,  $\kappa_{l,yy}$ ,  $\kappa_{l,zz}$ ) by the acoustic and low-frequency optical branches are (59.2, 53.5, 45.2) % and (25.3, 27.3, 30.2) %, respectively, at 800 K temperature.

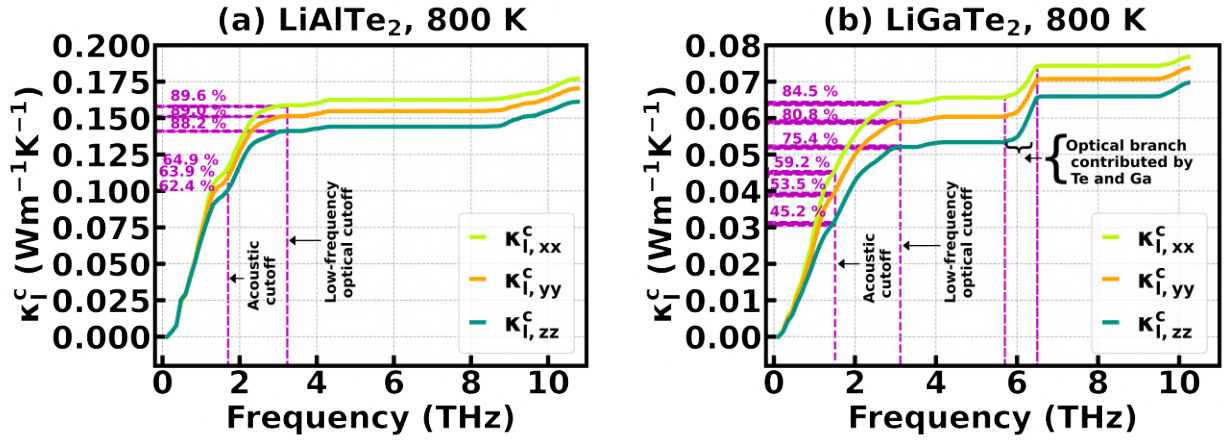

Figure S6: Cumulative lattice thermal conductivities at 800 K

## S7. Charge carrier scattering rates at 300 K

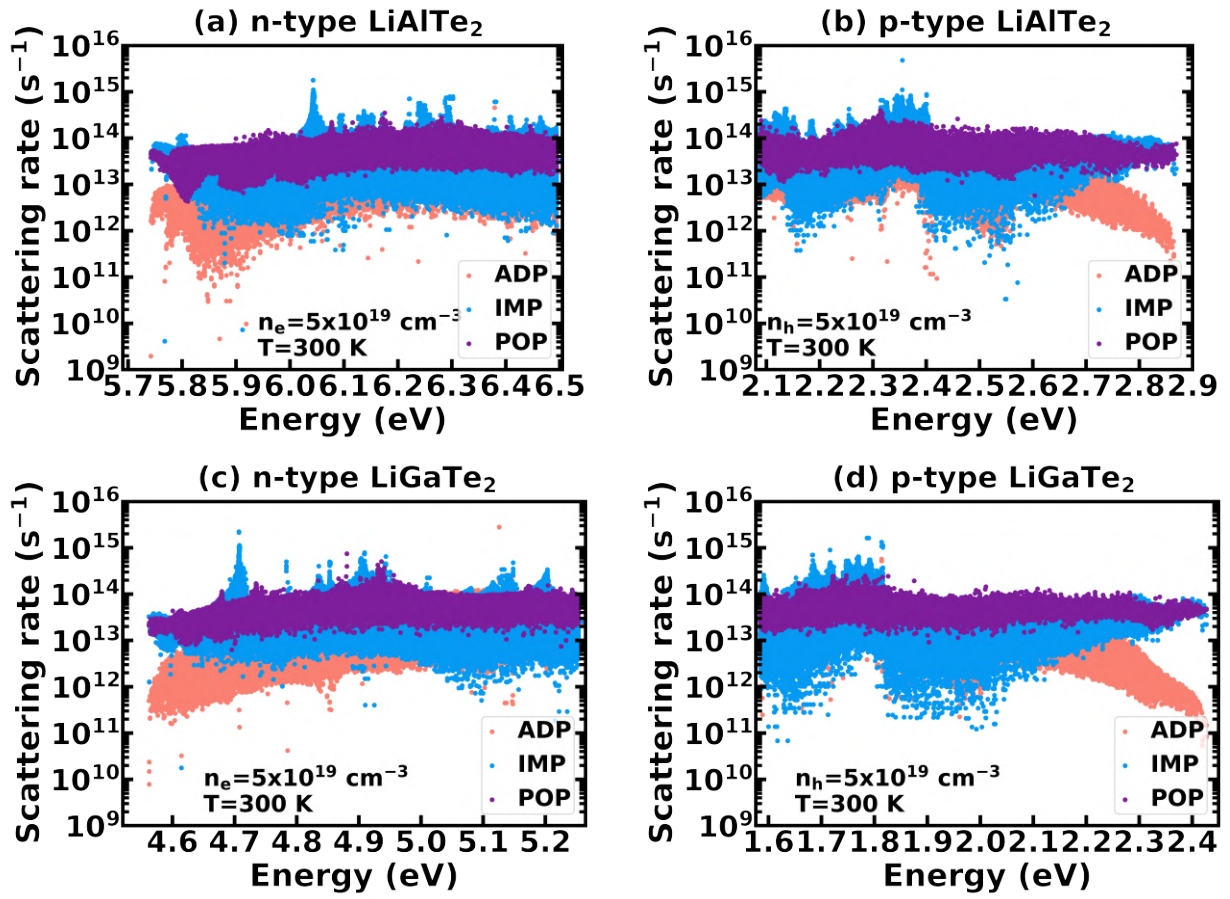

Figure S7: Charge carrier scattering rates at 300 K



## S8. Charge carrier scattering rates at 800 K

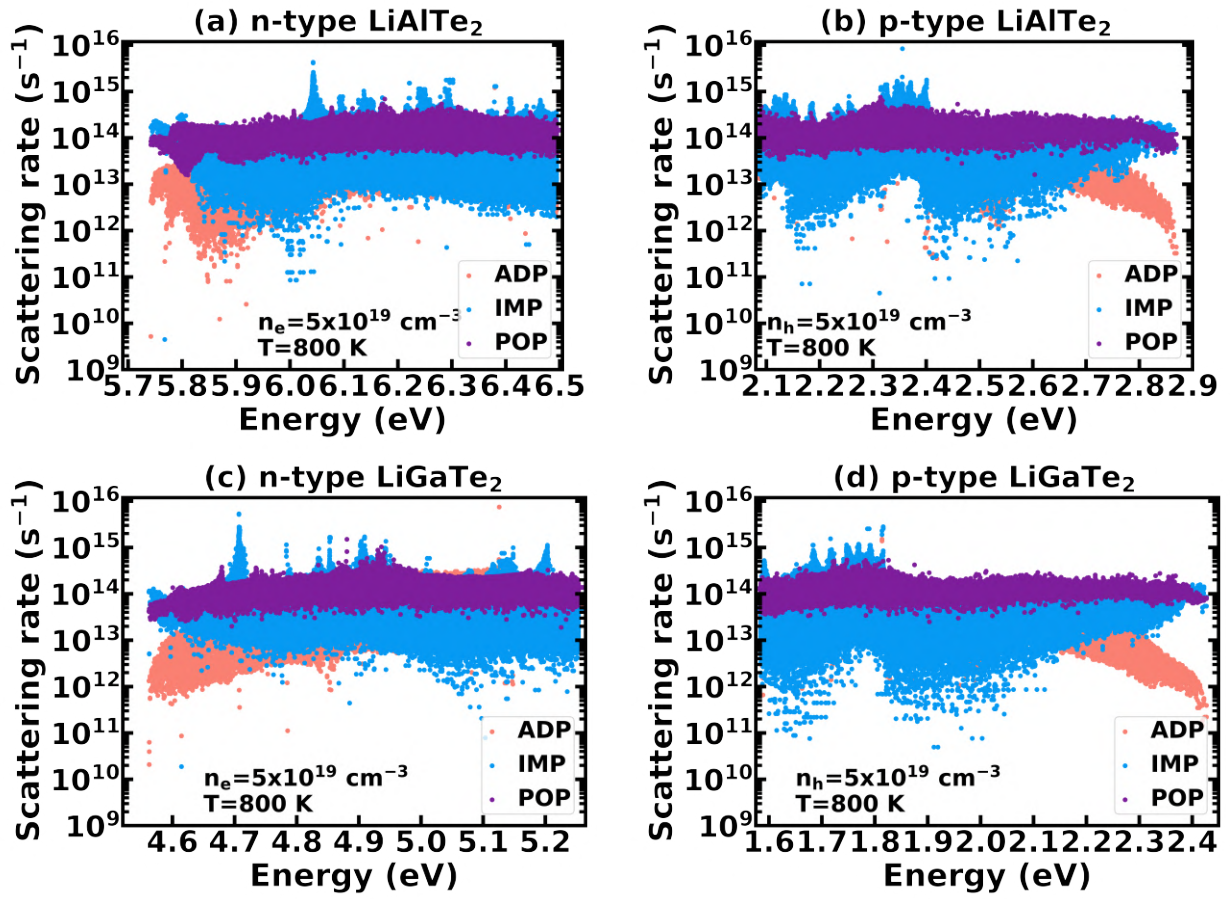

Figure S8: Charge carrier scattering rates at 800 K

S9. Electronic band structures using PBE functional including spin-orbit coupling effect

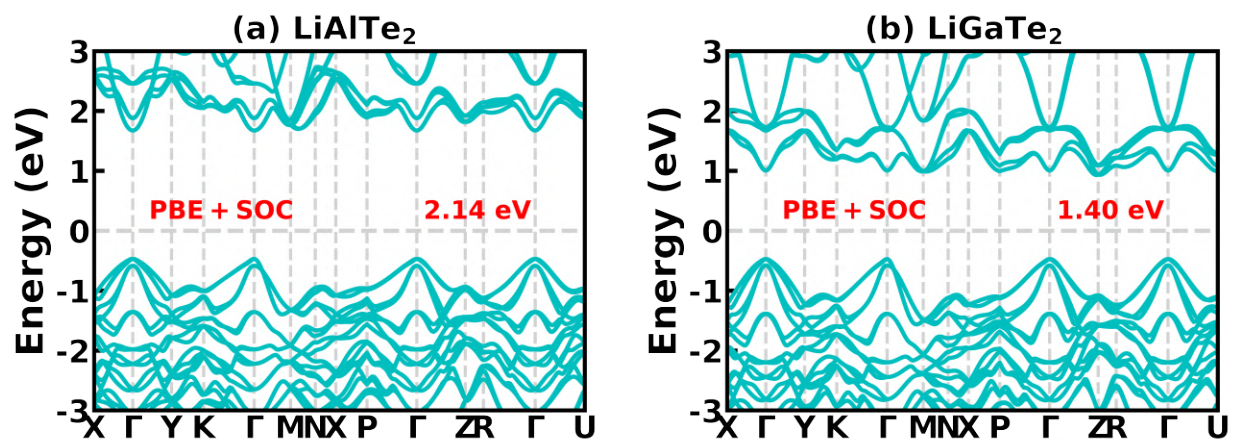

Figure S9: PBE+SOC electronic band structures. Fermi level is set to zero.
